# Supplementary material for: Surface-enhanced Raman scattering based detection of bacterial biomarker and potential surface reaction species
Source: Royal Society of Chemistry journal article supplement (doi:10.1039/c0an00421a), 2010-01-01
Supplement: c0an00421a.pdf [file c0an00421a.pdf]

**Supporting Information:**

**Surface-Enhanced Raman Scattering Based Detection of Bacterial Biomarker and Potential Surface Reaction Species**

Han-Wen Cheng, Wei-Qi Luo, Guo-Li Wen, Shuang-Yan Huan\*, Guo-Li Shen, and Ru-Qin Yu\*

State Key Laboratory for Chemo/Biosensing and Chemometrics, College of Chemistry and Chemical Engineering, Hunan University, Changsha 410082, China (\* Corresponding authors: Professors R.Q. Yu (email: rquy@hnu.cn) and S.Y. Huan (email: huanshuangyan@yahoo.com.cn))

**Table S1.** Raman bands and assignments

| Mode Assignment      | DPA <sub>(S)</sub> | DPA/AuNPs   |
|----------------------|--------------------|-------------|
| C-C ring bend        | 644                | 661         |
| C-H out-of-plane     | 759                | 825 (& 755) |
| Sym. ring breathing  | 994                | 999         |
| Trig. ring breathing | -                  | 1054        |
| C-H bend             | 1154               | 1170        |
| C-C ring mode        | 1269               | -           |
| C-C bend             | 1293               | 1300        |
| C-O stretch          | 1328               | 1352        |
| C-C ring stretch     | 1448               | 1420        |
| ring stretch         | 1573               | 1571        |
| C=O stretch          | 1640               | ~1639(sh.)  |

**Table S2.** Concentrations used for the solutions with mixed DPA and Py in different concentration ratios for the SERS experiment

| [DPA] (mM) | [Py] (mM) | C <sub>0</sub> (mM) | X <sub>DPA</sub> | X <sub>Py</sub> |
|------------|-----------|---------------------|------------------|-----------------|
| 0          | 0.30      | 0.30                | 0                | 1.00            |
| 0.15       | 0.15      | 0.30                | 0.50             | 0.50            |
| 0.20       | 0.10      | 0.30                | 0.67             | 0.33            |
| 0.25       | 0.05      | 0.30                | 0.83             | 0.17            |
| 0.27       | 0.03      | 0.30                | 0.92             | 0.08            |
| 0.29       | 0.01      | 0.30                | 0.98             | 0.02            |
| 0.30       | 0         | 0.30                | 1.00             | 0               |

(C<sub>0</sub> is the total concentration of Py and DPA)

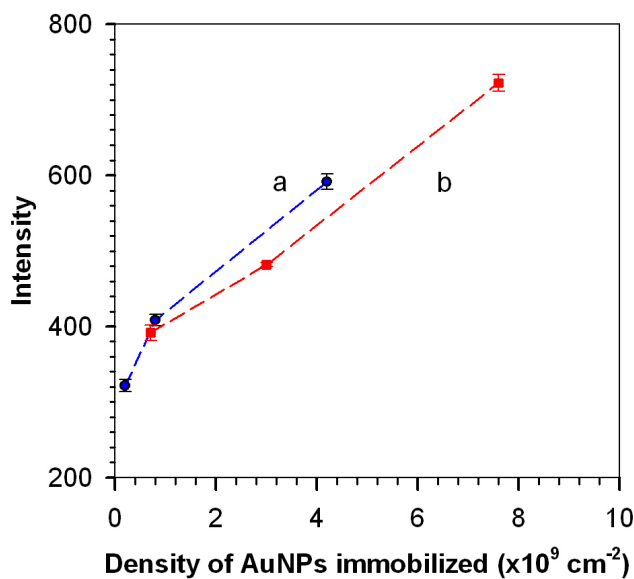

**Figure S1.** Plots of the SERS intensity (peak height at  $999 \text{ cm}^{-1}$ ) for an AuNPs/Au substrate in a DPA solution ( $[\text{DPA}] = 50 \text{ ppm}$ ) vs. the surface density of particles as determined from the FE-SEM analysis for Au NPs on conducting glass substrate. Sizes of Au nanoparticles: 50 (a) and 60 (b) nm.

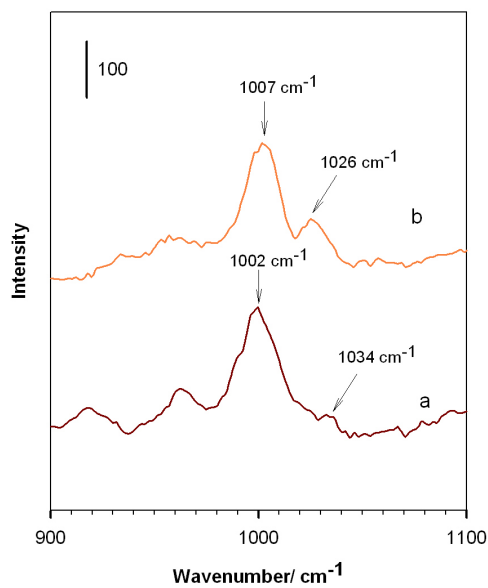

**Figure S2.** SERS spectra for DPA (0.01 mM) on an AuNPs/Au substrate before (a) and after exposure to a laser power of 12 mW (b).
